# Supplementary material for: Rapid assembly of ssDNA on gold electrode surfaces at low pH and high salt concentration conditions
Source: Royal Society of Chemistry journal article supplement (doi:10.1039/c3ra40810h), 2013-01-01
Supplement: c3ra40810h.pdf [file c3ra40810h.pdf]

## Supplementary Information

### **Rapid assembly of ss-DNAs on gold electrode surface at low pH and high salt concentration conditions**

Zhong Feng Gao<sup>a</sup>, Jian Bang Gao<sup>b</sup>, Long Yin Zhou<sup>a</sup>, Yu Zhang<sup>a</sup>, Jin Cao Si<sup>a</sup>,

Hong Qun Luo<sup>\*a</sup> and Nian Bing Li<sup>\*a</sup>

<sup>a</sup> *Key Laboratory of Eco-environments in Three Gorges Reservoir Region (Ministry of Education), School of Chemistry and Chemical Engineering, Southwest University, Chongqing 400715, China*

<sup>b</sup> *College of Feixian, Linyi University, Linyi 273400, P. R. China.*

\* Corresponding authors: [luohq@swu.edu.cn](mailto:luohq@swu.edu.cn) (H.Q. Luo); [linb@swu.edu.cn](mailto:linb@swu.edu.cn) (N.B. Li)

## DNA area percentage and Langmuir adsorption isotherm

The DNA area percentage ( $\theta$ ) was obtained from EIS by fitting the experimental results with the Randles circuit. We calculated the DNA area percentage on the gold electrode surface for the monolayers by using eqn (1):<sup>1</sup>

$$\theta = 1 - \left( \frac{R_{ct}^{Au}}{R_{ct}^{SAM}} \right) \quad (1)$$

where  $R_{ct}^{Au}$  was charge transfer resistance values for bare gold electrode and  $R_{ct}^{SAM}$  was charge transfer resistance values for DNA-modified gold electrode.

As shown in Fig. S1, we found that the relationship between the DNA area percentage and the DNA concentration obeys the Langmuir adsorption isotherm quite well, and the correlation coefficient was 0.9820. In this case, the electrode surface state can be determined by using the Langmuir adsorption isotherm according to the following equation:<sup>2</sup>

$$KC = \theta / (1 - \theta) \quad (2)$$

where  $K$  is the adsorption–desorption equilibrium constant, and  $C$  is the DNA concentration. The standard free-energy of adsorption ( $\Delta G_{ads}^{\circ}$ ) was calculated from this isotherm using the following relation:<sup>3</sup>

$$K = (1/55.5) \exp(-\Delta G_{ads}^{\circ} / RT) \quad (3)$$

where 55.5 is the water concentration,  $R$  is the universal gas constant and  $T$  is the thermodynamic temperature. The magnitude of  $\Delta G_{ads}^{\circ}$  is consistent with ssDNA adsorption behavior. Generally, values of  $\Delta G_{ads}^{\circ}$  up to  $-20 \text{ kJ mol}^{-1}$  are associated with electrostatic interaction between gold surface and ssDNA probe, which indicates physical adsorption.  $\Delta G_{ads}^{\circ}$  values more negative than  $-40 \text{ kJ mol}^{-1}$  signify covalent bond. As shown in Table S1, values of  $\Delta G_{ads}^{\circ}$  at different pHs on ss-DNA assembly were all more negative than  $-40 \text{ kJ mol}^{-1}$ . This probably suggests that the mechanism related to the adsorption of ssDNA onto the gold surface under different pH

conditions is a chemically absorbed process and involves covalent bond. The absolute value of  $\Delta G^{\circ}_{ads}$  increases with decreasing pH value, indicating that chemisorption on the gold surface was increased in lower pH environment. In our assay, the larger  $\Delta G^{\circ}_{ads}$  value means increased number of ssDNA attached to gold surface. Thus, the electrochemical impedance value increased with decreasing pH value as shown in Fig. 4 in the manuscript.

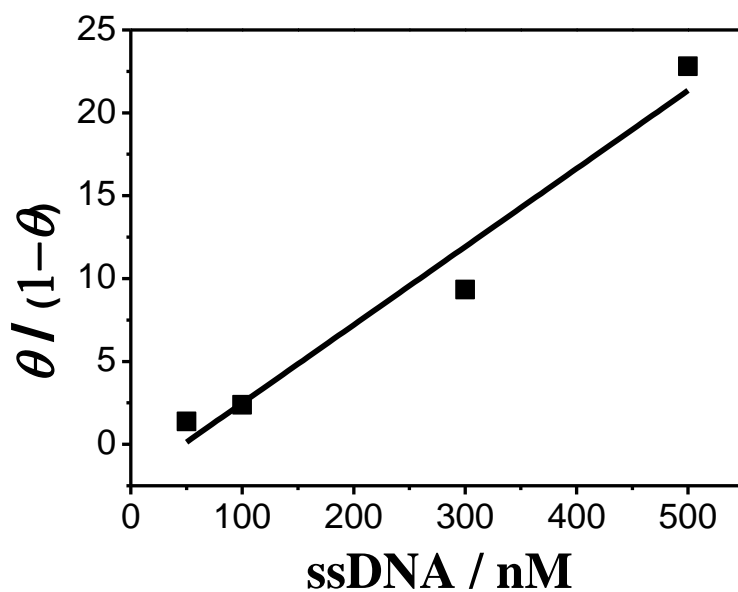

**Fig. S1** The graph of Langmuir adsorption isotherm for the adsorption of ssDNA onto the surface of gold.

**Table S1** Thermodynamic parameters for different pHs on ssDNA assembly.

| pH  | $\theta/(1-\theta)$ | $K (\times 10^6 \text{ M})$ | $\Delta G_{ads}^\circ (\text{KJ mol}^{-1})$ |
|-----|---------------------|-----------------------------|---------------------------------------------|
| 3.4 | 9.38                | 18.76                       | -51.44                                      |
| 4.4 | 7.76                | 15.55                       | -50.98                                      |
| 5.4 | 2.34                | 4.68                        | -48.01                                      |
| 6.4 | 0.61                | 1.21                        | -44.65                                      |
| 7.4 | 0.27                | 0.54                        | -42.65                                      |
| 8.4 | 0.11                | 0.21                        | -40.31                                      |

**Table S2** Main parameters obtained from EIS results showing the effect of the salt concentration.<sup>a</sup>

| Concentration of NaCl<br>(mol/L) | Rs ( $\Omega$ ) |        | Rct ( $\Omega$ ) |        | $\theta$ |        |
|----------------------------------|-----------------|--------|------------------|--------|----------|--------|
|                                  | pH 3.4          | pH 7.4 | pH 3.4           | pH 7.4 | pH 3.4   | pH 7.4 |
| Bare                             | 150.8           | 150.8  | 89.23            | 89.23  | \        | \      |
| 0.1                              | 180.4           | 173.2  | 6223             | 2208   | 0.986    | 0.959  |
| 0.5                              | 166.9           | 168.5  | 19300            | 8841   | 0.995    | 0.989  |
| 1.0                              | 168.3           | 176.6  | 28610            | 16020  | 0.997    | 0.994  |

<sup>a</sup> The solution resistance (Rs), the charge transfer resistance (Rct), and the DNA area percentage ( $\theta$ ) were obtained by fitting the experimental results with the Randles circuit. The parameters of the bare Au electrode were obtained in 5 mM  $[\text{Fe}(\text{CN})_6]^{3-/4-}$ -phosphate buffered saline (PBS) (5 mM phosphate, 50 mM NaCl, pH 7.0) solution after electrochemical cleaning.

**Table S3** Main parameters obtained from EIS results showing the effect of the immobilization time.<sup>a</sup>

| Time<br>(min) | Rs ( $\Omega$ ) |        | Rct ( $\Omega$ ) |        | $\theta$ |        |
|---------------|-----------------|--------|------------------|--------|----------|--------|
|               | pH 3.4          | pH 7.4 | pH 3.4           | pH 7.4 | pH 3.4   | pH 7.4 |
| Bare          | 150.8           | 150.8  | 89.23            | 89.23  | \        | \      |
| 10            | 133             | 180.7  | 7388             | 5480   | 0.988    | 0.984  |
| 30            | 166.9           | 168.5  | 17300            | 6841   | 0.994    | 0.987  |
| 60            | 173.7           | 176.9  | 21010            | 9376   | 0.996    | 0.990  |
| 150           | 175.2           | 183.6  | 23979            | 12260  | 0.996    | 0.993  |
| 720           | \               | 174.9  | \                | 21490  | \        | 0.996  |

<sup>a</sup> The solution resistance (Rs), the charge transfer resistance (Rct), and the DNA area percentage ( $\theta$ ) were obtained by fitting the experimental results with the Randles circuit. The parameters of the bare Au electrode were obtained in 5 mM  $[\text{Fe}(\text{CN})_6]^{3-/4-}$ -phosphate buffered saline (PBS) (5 mM phosphate, 50 mM NaCl, pH 7.0) solution after electrochemical cleaning.

## References

- 1 R. P. Janek and W. R. Fawcett, *Langmuir*, 1998, **14**, 3011–3018.
- 2 F.S. Souza and A. Spinelli, *Corros. Sci.*, 2009, **51**, 642–649.
- 3 I. Ahamad, R. Prasad, and M.A. Quraishi, *J. Solid State Electrochem.*, 2010, **14**, 2095–2105.
